# Supplementary material for: A protein quality control pathway at the mitochondrial outer membrane
Source: eLife. 2020 Mar 2;9:e51065. doi: 10.7554/eLife.51065 (PMC7136024; doi:10.7554/eLife.51065)
Supplement: Figure 1—source data 1. [file elife-51065-fig1-data1.xlsx]

## Sheet: Figure 1 
1B	159 25	0	7659.32	9893.27	0.774195	100		12553.3	16140.1	0.777768	100		12132.5	20693.2	0.586302	100
		15	9102.49	12409	0.733541	94.7489		10678.8	15955.3	0.669291	86.0528		10219.6	20948.5	0.487847	83.2075
		30	9067.56	12718.8	0.712926	92.0861		9125.34	14218.6	0.641789	82.5167		10315.9	18722.9	0.550976	93.9748
		60	7200.49	12298.4	0.585482	75.6247		7745.56	13365.9	0.579502	74.5083		9080.31	17459.2	0.520087	88.7064
	160 25	0	6566.95	12568.5	0.522493	100		10588.8	12027.1	0.880414	100		13663.9	14403.7	0.948644	100
		15	5608.71	11607.4	0.483202	92.4801		10068.7	14536.7	0.692643	78.6724		12147	14524.8	0.836296	88.1569
		30	4682.83	12599	0.371684	71.1366		11796.3	16832.6	0.7008	79.5989		9524.39	14764.6	0.645084	68.0006
		60	4161.25	13160.8	0.316185	60.5147		10172.9	18171.1	0.559838	63.588		8828.39	15497.3	0.569672	60.0512
	159 37	0	13671.4	12873.7	1.06196	100		13093.1	11505.3	1.13801	100		13656.9	15925.8	0.85753	100
		15	10483.8	12811.8	0.818291	77.0546		10795.7	11704	0.922391	81.0529		12964.9	19211.3	0.674858	78.6979
		30	9834.97	12600.4	0.780531	73.4989		8754.34	11903.2	0.735463	64.6271		12545	22041.3	0.569159	66.3719
		60	7793.02	13027.7	0.598189	56.3286		7558.27	12529.1	0.603256	53.0097		10726.5	23750.1	0.451638	52.6673
	160 37	0	5259.12	13667.7	0.384786	100		11267.6	13633.2	0.826479	100		11569.3	16840.5	0.686993	100
		15	2469.98	14627.3	0.168861	43.8844		5699.78	13298.1	0.428616	51.8605		5021.73	16475.1	0.304808	44.3684
		30	1022.6	13439.5	0.0760888	19.7743		2562.05	12870.8	0.199059	24.0852		1554.79	16243.2	0.0957195	13.9331
		60	465.678	15169	0.0306994	7.9783		1263.38	13396.8	0.0943041	11.4104		551.577	16548	0.0333319	4.85186
	158 25	0	17077.2	10134.4	1.68507	100		15471.2	12708.7	1.21738	100		25276.4	19821.9	1.27517	100
		30	10301	11100	0.92802	55.0732		9297.17	12482.4	0.744822	61.1824		15855.4	20960.5	0.756444	59.3209
		60	8165.02	11222.4	0.727562	43.1771		6368.78	11595	0.54927	45.1191		13246.7	20442.6	0.647994	50.8162
		120	7922.49	13154	0.602286	35.7426		4762.78	11165.2	0.426575	35.0404		15899.6	21019.3	0.75643	59.3198
	157 25	0	14445	12546.6	1.15131	100		12144.4	12270.4	0.989731	100		20325.4	13296.4	1.52864	100
		30	6577.56	11399.1	0.577026	50.1192		8316.68	11829	0.703073	71.0367		13740.4	12961.2	1.06011	69.3499
		60	4337.59	11403.3	0.38038	33.0389		6208.49	11896.3	0.521882	52.7297		9637.17	11953.7	0.806208	52.7401
		120	2822.98	14217.3	0.19856	17.2465		6192.95	12694	0.487865	49.2926		9384.24	11701.7	0.801955	52.4618
	158 37	0	11113.5	16128.7	0.689051	100		15096.3	15759.6	0.957914	100		23137.3	19321.4	1.19749	100
		30	5449.12	16570.2	0.328851	47.7252		8872.63	16522.4	0.537007	56.06		15003.6	20959.3	0.715842	59.7783
		60	5050.47	16406.9	0.307825	44.6738		5272.54	16183.3	0.325802	34.0116		15041.9	22219.3	0.676974	56.5326
		120	4276.23	16391.5	0.26088	37.8608		3877.15	16602.6	0.233528	24.3788		13621.1	22876.4	0.595421	49.7222
	157 37	0	9971.56	15530.3	0.642072	100		13088.9	15252.3	0.858162	100		19256.5	12927.7	1.48955	100
		30	1963.03	15687.3	0.125135	19.4893		1816.96	16489.1	0.110191	12.8404		4031.27	12453.2	0.323714	21.7323
		60	983.305	16036.9	0.061315	9.54955		1065.01	17453.7	0.0610194	7.11048		1114.47	12651.9	0.0880872	5.91366
		120	752.941	17447.5	0.0431546	6.72115		641.991	17993.5	0.035679	4.15761		2114.45	13014.1	0.162473	10.9075

## Sheet: Figure 1-figure supplement 1
S1B
sen2-1HA 25	3626.93	100		sam35-2 25	7455.73	100
	1843.33	50.8233			6940.85	93.0942
	1582.31	43.6265			6678.9	89.5808
SEN2 37	7864.42	100		SAM35 37	11302.6	100
	5365.88	68.2299			9938.39	87.9304
	5336.37	67.8546			9998.39	88.4613
sen2-1 37	10694	100		sam35-2 37	9151.27	100
	1745.79	16.325			2962.28	32.3701
	664.698	6.21562			2054.33	22.4485
S1C
157 GFP	6271.47	100		160 GFP	7405.88	100
	4063.1	64.7871			5430.81	73.331
	2350.2	37.4746			4527.57	61.1348
	961.062	15.3244			3739.69	50.4962
	327.092	5.21556			2044.08	27.6008
S1D
sam35			sen2
	9790.8	100		7657.25	100
	3847.22	39.2943		5965.54	77.9071
	1839.91	18.7922		4485.88	58.5835
	1136.77	11.6106		2343.74	30.6081
S1E
spheroplasts
157	5259.59	100		160	10128	100
	3869.28	73.5661			9476.05	93.5629
	3012.91	57.2842			6783.63	66.979
	2605.72	49.5423			5047.56	49.8377
	9196.85	100			17645.8	100
	9013.92	98.011			16269.6	92.2007
	9334.97	101.502			12964.9	73.4733
	9027.85	98.1624			13324.5	75.5108
