# Supplementary material for: A protein quality control pathway at the mitochondrial outer membrane
Source: eLife. 2020 Mar 2;9:e51065. doi: 10.7554/eLife.51065 (PMC7136024; doi:10.7554/eLife.51065)
Supplement: Figure 2—source data 1. [file elife-51065-fig2-data1.xlsx]

## Sheet: Figure 2 
2A
PRE 157	0	8334.32	7572.83	1.10055	100		6300.98	100		10268.9	100
	30	1573.26	7035.54	0.223615	20.3184		1952.48	30.9869		3468.55	33.7773
	60	523.577	6879.66	0.0761051	6.91515		687.577	10.9122		1116.41	10.8717
	120	335.92	7351.61	0.0456934	4.15185		302.506	4.80093		857.113	8.3467
pre1pre2 157	0	10502.8	7965.66	1.3185	100		9568.1	100		13089.5	100
	30	7974.8	8275.37	0.96368	73.0889		8215.86	85.8672		10810.2	82.5871
	60	4933.37	7995.2	0.617042	46.7986		6331.5	66.173		8679.5	66.3089
	120	3002.35	8929.27	0.336237	25.5014		5285.2	55.2377		7745.08	59.1702
PRE 160	0	3595.22	9273.68	0.38768	100		3657.76	100		4734.71	100
	15	1260.72	8849.15	0.142468	36.7488		860.234	23.518		1200.77	25.361
	30	529.284	8467.73	0.062506	16.1231		434.577	11.881		341.335	7.2092
	60	405.263	9252.68	0.0437995	11.2978		286.335	7.82815		169.021	3.56983
pre1pre2 160	0	6481.71	10222.4	0.63407	100		7742.05	100		4510.38	100
	15	5943.76	10446.2	0.568987	89.7356		7732.3	99.874		4715.96	104.558
	30	5108.35	10977.5	0.465349	73.3907		6890.43	89		4070.61	90.25
	60	3766.52	10605	0.355165	56.0134		4688.52	60.5591		2544.84	56.4219
2B
CIM 157	0	4461	5030.25	0.886836	100		6375.52	100		10192.2	100
	30	1314.84	5314.25	0.247418	27.899		1202.18	18.8563		1285.43	12.6119
	60	965.355	5623.25	0.171672	19.3578		494.749	7.76014		617.284	6.05644
	120	618.749	6133.61	0.100878	11.3751		173.192	2.71652		110.364	1.08283
cim 157	0	8957.15	7168.2	1.24957	100		16179.7	100		16997.8	100
	30	7515.78	7803.9	0.96308	77.073		13996.7	86.5081		14604.6	85.9206
	60	6444.25	7695.78	0.837374	67.0131		11981.7	74.0542		12257.2	72.1108
	120	6136.25	8262.32	0.742679	59.4348		11383.5	70.3568		9114.42	53.6212
CIM 160	0	2662.33	6559.15	0.405895	100		8222.88	100		13215.2	100
	15	1003.79	6315.78	0.158934	39.1563		2424.2	12.1215		5512.88	41.7163
	30	422.82	6898.32	0.0612932	1.51007		293.849	3.57355		1848.96	13.9912
	60	40.364	7358.73	0.00548518	1.35138		221.021	2.68788		1217.31	9.21142
cim 160	0	7077.78	9439.34	0.749818	100		11651.3	100		19057.7	100
	15	6665.02	10683	0.623891	83.2057		10288.6	88.3042		17608.7	92.3969
	30	5203.37	10398.8	0.500384	66.7341		10301.9	88.4188		16248.7	85.2607
	60	4096.54	8999.92	0.455175	60.7047		9971.64	85.584		14613	76.6777
2D
WT 157	0	28277.7	100		28472.6	100		6056.47	100
	30	9663.75	34.1745		11891.5	41.7648		1373.84	22.6839
	60	2938.22	10.3906		5448.49	19.1359		729.234	12.0406
	120	1384.72	4.89686		3720.37	13.0665		457.577	7.55518
uba1-204 157	0	16921.7	100		25708	100		5991.05	100
	30	9756.92	57.6594		17601.8	68.4682		3880.28	64.7678
	60	6171.15	36.4689		13880.8	53.994		3118.45	52.0517
	120	5319.61	31.4367		8592.63	33.424		2905.2	48.4924
WT 160	0	12346.4	100		10692.6	100		7863.8	100		10676	100
	15	5629.07	45.5929		5062.58	47.3465		3711.49	47.1971		5598.97	52.4444
	30	1419.67	11.4987		2010.52	18.8029		1742.81	22.1624		2735.35	25.6214
	60	347.435	2.81406		766.82	7.17149		908.477	11.5526		1439.96	13.4878
uba1-204 160	0	13665.1	100		13416.1	100		8900.46	100		10122.4	100
	15	8574.61	62.7483		8023.2	59.8027		5964.27	67.0108		7567.42	74.7588
	30	5756.49	42.1255		6072.32	45.2614		5239.8	58.8712		5564.56	54.9725
	60	3685.93	26.9733		3607.55	26.8897		4895.27	55.0002		4858.99	48.0022

## Sheet: Figure 2- figure supplement 2
S2A	sam35			sen2
WT	14293.8	100	WT	6331.73	100											8110.12	100
	1548.26	10.8317		2277.86	35.9753											2483.3	30.6198
	763.234	5.33963		1472.43	23.2547											1523.31	18.7828
pep4	13558.3	100	pep4	8919.61	100											827.062	10.1979
	1848.55	13.6341		2177.4	24.4113											4787.86	100
	1471.91	10.8562		1450.26	16.2592											3898.86	81.4322
																3656.98	76.3803
S2B	sam35			sen2												3514.98	73.4145
WT	6475.61	100	WT	15084.7	100
	1141.96	17.6348		2231.57	14.7935
	702.062	10.8416		250.335	1.65952
yme1	8069.44	100	yme1	10764.7	100
	495.577	6.14141		448.82	4.16936
	438.92	5.43929		167.849	1.55925
afg3	8191.15	100	afg3	13134.7	100
	967.305	11.8092		1623.06	12.3571
	452.163	5.52014		750.678	5.71523
yta12	7179.95	100	yta12	20727.8	100
	899.891	12.5334		2735.93	13.1994
	340.456	4.74176		571.82	2.75871
oma1	6569	100	oma1	15235.6	100
	1037.36	15.7917		366.163	2.40333
	890.113	13.5502		144.849	0.950725
pim1	6445.28	100	pim1	15300.4	100
	723.577	11.2265		994.548	6.50013
	620.698	9.63028		145.364	0.950065
S2E
pre1-1 pre2-2	sen2-1	porin	normalized to porin	% of 12,000g mito remaining	Cue1p signal	Cue1p/porin	% normalized Cue1p signal
pellet	5211.1	17409.4	0.299327		8288.93	0.476119
sucrose	4068.84	13271	0.306596	102.428	286.263	0.0215705	4.5305
pellet	8271.29	11610.9	0.712376		3363.01	0.289644
sucrose	4442.48	12055.6	0.368498	51.7281	439.335	0.0364423	0.125818
pellet	13728	13088.6	1.04886		4231.26	0.323279
sucrose	9143.22	19880.8	0.459902	43.848	2485.65	0.125028	0.386749
pellet	8633.87	4667.72	1.8497		15623.4	3.77559
sucrose	8776.19	5389.13	1.6285	88.0412	4325.8	0.80269	16.8043
pre1-1 pre2-2	sam35-2	porin	normalized to porin	% of 12,000g mito remaining	porin	Cue1p signal	Cue1p/porin	% normalized Cue1p signal
pellet	17797.2	5145.26	3.45896		5145.26	15401.2	2.99328
sucrose	2824.69	925.284	3.05278	88.2572	925.284	328.263	0.35477	11.8522
pellet	16815.5	3852.3	4.36505		5145.26	15401.2	2.99328
sucrose	6584.02	2765.89	2.38044	68.8194	2765.89	1058.77	0.382795	12.7885
pellet	16815.5	3852.3	4.36505		5145.26	15401.2	2.99328
sucrose	21808	7189.33	3.03339	87.6965	7189.33	5587.28	0.777163	25.9636
pellet	14312.3	12226.9	1.17056		12226.9	14034.9	1.14787
sucrose	11161.8	18058.1	0.618106	52.8043	18058.1	2077.33	0.115036	10.0217
S2D	Cue1 1	Cue1 2	Cue1 3
Total	18128	23430.1	13849.8
sup 12000	10951	13542.7	10491
pellet 12000	3804.37	3514.12	2516.62
% in sup	74.2171	79.3975	80.6527
% in pellet	25.7829	20.6025	19.3473
