# Supplementary material for: A protein quality control pathway at the mitochondrial outer membrane
Source: eLife. 2020 Mar 2;9:e51065. doi: 10.7554/eLife.51065 (PMC7136024; doi:10.7554/eLife.51065)
Supplement: Figure 3—source data 1. [file elife-51065-fig3-data1.xlsx]

## Sheet: Figure 3
3A
WT 157	0	8576.44	10366.2	0.827349	100		10344.3	100		15227.4	100
	30	2282.79	10832.2	0.210741	25.4718		2712.28	26.2201		3396.69	22.3065
	60	1561.55	11233.4	0.13901	16.8018		1045.89	10.1108		1299.43	8.5335
	120	631.577	10959.4	0.0576289	6.96548		560.698	5.42037		900.77	5.91547
san1 157	0	11660.6	11390.1	1.02375	100		15910.9	100		10709.4	9741.44	1.09937	100
	30	7320.47	11481.7	0.637578	62.2787		8339.2	52.4117		5620.59	10278.1	0.546849	49.742
	60	3392.74	11690.8	0.290206	28.3473		3091.15	19.4278		2462.62	10143.6	0.242777	22.0833
	120	1287.31	11972.5	0.107522	10.5027		1659.38	10.4291		1301.6	10348.3	0.125779	11.441
ubr1san1 157	0	13870.9	11704.1	1.18513	100		16126.3	100		16174.2	100
	30	10901.7	12422.6	0.87757	74.0484		10439	64.7329		10734	66.3649
	60	6065.05	12132.8	0.499891	42.1803		5961.12	36.9652		4778.23	29.5422
	120	2945.13	12437.3	0.236799	19.9808		2882.86	17.8768		3216.15	19.8844
3B
WT 160	0	15045.3	12442	1.20923	100		8608.8	100		10645.6	100
	15	7225.46	14526.2	0.49741	41.1343		2489.03	28.9126		4794.61	45.0383
	30	3876.02	13804.2	0.280787	23.2202		1624.55	18.8708		3427.12	32.1928
	60	2066.62	13517.5	0.152885	12.6432		672.062	7.80668		2656.22	24.9513
ubr1 160	0	9341.29	10710.5	0.872163	100		7431.46	100		9207.58	100
	15	7914.41	11012.6	0.718668	82.4007		5010.56	67.4236		5725.02	62.1773
	30	6170.12	10972.4	0.562329	64.4752		3071.1	41.3257		3845.37	41.7631
	60	3646.68	10371.8	0.351596	40.3132		2120.69	28.5367		2981.88	32.3851
ubr1san1 160	0	11529.7	11620.6	0.992177	100		9833.51	100		10768.9	100
	15	8722.07	11168.3	0.780969	78.7126		7113.56	72.34		8823.53	79.6599
	30	6447.36	10434.9	0.617868	62.2739		4639.9	47.1846		6525.99	53.9707
	60	4590.75	9995.9	0.459263	46.2885		3901.37	39.6742		4497.63	34.9091
3C
WT 160	0	8376.2	100		9639.41	100		5867.15	100
	15	4068.88	48.5767		5689.87	59.0272		3578.05	60.9846
	30	2188.16	26.1236		3719.63	38.5877		1555.96	26.5199
	60	935.062	11.1633		1781.51	18.4815		646.355	11.0165
ubc4 160	0	6426.47	100		7574.92	100		5052.54	100
	15	5236.1	81.4772		5590.1	73.7974		3451.97	68.3216
	30	3822.45	59.4797		4358.49	57.5384		2952.2	58.4299
	60	2425.62	37.7442		3384.25	44.677		2434.83	48.1903

## Sheet: Figure 3-figure supplement 1
S3A
WT 157	17896.7	100
	6804.73	38.0223
	3642.22	20.3514
	2179.2	12.1766
mdm30 160	13044.1	100
	2950.05	22.6161
	1739.62	13.3365
	932.447	7.14844
WT 160	16839.4	100
	1519.18	9.02163
	808.749	4.80273
	548.092	3.25483
mdm30 160	11285	100
	1921.45	17.0266
	934.991	8.28527
	715.163	6.3373
S3B
WT 157	13677.2	100
	2388.62	17.4643
	1632.08	11.9329
rsp5-1 157	13288.9	100
	1439.43	10.8318
	780.648	5.87445
rsp5-3 157	9675.02	100
	1832.5	18.9405
	1247.89	12.8981
WT 160	11454.9	100
	4154.35	36.2671
	1943.26	16.9644
rsp5-1 160	7430.61	100
	2105.43	28.3345
	963.477	12.9663
rsp5-3 160	7828.02	100
	3090.5	39.4799
	969.305	12.3825
S3C
WT 157	14315.7	100
	3798.74	26.5355
	1473.13	10.2904
	861.477	6.01772
ubr1 157	11022.5	100
	2797.62	25.381
	865.941	7.85613
	573.284	5.20104
3D
WT 160	15974.5	100
	8920.68	55.8433
	5776.9	36.1633
	2925.35	18.3126
san1 160	13824.8	100
	8611.68	62.2917
	5253.07	37.9975
	2748.54	19.8813
