# Supplementary material for: A protein quality control pathway at the mitochondrial outer membrane
Source: eLife. 2020 Mar 2;9:e51065. doi: 10.7554/eLife.51065 (PMC7136024; doi:10.7554/eLife.51065)
Supplement: Figure 4—source data 1. [file elife-51065-fig4-data1.xlsx]

## Sheet: Figure 4
4A
SSA1 157	0	4090.05	5641.25	0.725027	100		3822.47	100		5000.47	100
	30	1942.15	6701.78	0.289797	39.9705		1416.55	37.0585		1028.06	20.5593
	60	1554.62	7373.32	0.210844	29.0808		743.355	19.447		359.627	7.19187
	90	1599.08	7973.27	0.200556	27.6618		580.163	15.1777		178.021	3.56009
ssa1-45 157	0	10482.2	7967.2	1.31567	100		8124.37	100		13010.5	100
	30	10593.1	8349.66	1.26869	96.4292		7990.66	98.3542		12250.8	94.1608
	60	10156.9	8263.83	1.22907	93.4179		7371.95	90.7388		11795.4	90.6609
	90	9301.44	7573.66	1.22813	93.3462		7428.95	91.4404		11721.5	90.0925
SSA1 160	0	2481.69	114656	0.0216447	100		2367.4	100		1019.77	100
	15	1480.08	107741	0.0137374	63.4677		1444.08	60.9988		386.991	37.9489
	30	910.163	107739	0.00844788	39.0297		862.577	36.4357		104.021	10.2004
	60	454.263	107722	0.00421699	19.4827		452.263	19.1038		20.95	2.05438
ssa1-45 160	0	7305.49	10633.9	0.687003	100		7198.07	100		10555.8	100
	15	7408.56	10832.7	0.683908	99.5495		7040.07	97.805		10133.4	95.9983
	30	6452.02	10103.5	0.638592	92.9534		6142.54	85.3359		10097.1	95.6549
	60	6949.73	10460.6	0.664375	96.7062		6298.66	87.5048		8869.76	84.0273
4D
WT 157	0	15123.5	7034.71	2.14984	100		20441.4	100		36944.5	100
	30	4391.42	6799.52	0.645843	30.0415		7238.32	35.4101		14718	39.8381
	60	3170.1	7434.93	0.42638	19.8331		4168.76	20.3937		12042.2	32.5954
	90	956.749	7618.93	0.125575	5.84115		2827.93	13.8343		2938.15	7.95286
sis1-DAmP 157	0	16530.6	6715.1	2.4617	100		19509.9	100		36919.1	100
	30	8955.34	6510.1	1.37561	55.8802		11025.2	56.5106		21432.6	82.4174
	60	6066.02	7531.18	0.805455	32.7194		7705.54	39.4954		17664.2	47.8457
	90	3728.18	9088.65	0.410201	16.6633		4730	24.2441		14018.5	37.9709
wt 160	0	7952.73	11190.1	0.710694	100		8065.02	100		14947.2	100
	15	4028.47	10948.4	0.367949	51.7732		4564.59	56.5973		9028.7	60.4038
	30	2159.08	10104.1	0.213684	30.067		2370.33	29.3902		5397.9	36.113
	60	1291.84	9849.08	0.131164	18.4557		1285.84	15.9434		1463.96	9.7942
sis1-DamP 160	0	7989.49	8090.54	0.98751	100		8084.78	100		11922.5	100
	15	6993.78	8056.71	0.868069	87.9048		6851.42	84.7446		9347.75	78.4044
	30	5610.25	8390.66	0.66863	67.7087		5405.18	66.8562		6142.02	51.5163
	60	3397.88	8950.08	0.379648	38.445		3648.18	45.124		2755.69	23.1134

## Sheet: Figure 4-figure supplement 1
S4B		5719.64	100
Fzo1 WT		964.012	16.8544
		108.021	1.8886
		132.192	2.31119
Fzo1 ssa1-45		9037.29	100
		3068.2	33.9505
		796.527	8.81378
		610.163	6.75162
S4D
wt 157	4596.6	100		WT 160	9899.58	100
	672.406	14.6283			6285.56	63.4932
	250.849	5.45728			3837.42	38.7634
	101.364	2.2052			2342.98	23.6675
ydj1 157	2277.21	100		ydj1 160	8301.39	100
	463.87	20.3701			4639.78	55.8916
	92.778	4.07419			2968.47	35.7587
	55	2.41523			1583.72	19.0778
WT 157	11006.8	100		wt 160	8550.54	100
	1856.72	16.8689			4813.81	56.2983
	848.406	7.70805			3152.03	36.8636
	528.577	4.8023			2359.33	27.5927
hlj1 157	6534.88	100		hlj1 160	7250.88	100
	1196.89	18.3154			3342.57	46.0988
	731.234	11.1897			1999.38	27.5742
	415.991	6.3657			1116.43	15.3971
S4E
wt 157	16250.7	100		WT 160	27607.3	100
	8358.47	51.4346			18239.5	66.0675
	4227.45	26.014			9866.24	35.7378
	2565.26	15.7855			4340.73	15.7231
sse1 157	10931.4	100		sse1 160	27916.9	100
	5084.4	46.512			16717.3	59.8825
	2190.01	20.0342			7002.41	25.0831
	1259.89	11.5255			1935.96	6.93473
S4F
wt 160	5260	100		wt 157	13941	100
	2336.08	44.4122			6297.86	45.175
	1475.89	28.0587			3231.26	23.178
	616.991	11.7299			1087.94	7.80388
hsc82 160	8426.66	100		hsc82 157	12068	100
	3643.28	43.2351			5813.15	48.1702
	1420.31	16.8549			2865.01	23.7407
	459.577	5.45385			1269.18	10.517
WT 160	5670.1	100		WT 157	10542.2	100
	1232.6	21.7385			1237.89	11.7422
	640.991	11.3047			450.749	8.55133
	211.849	3.73625			190.435	1.80641
sti1 160	8923.66	100		sti1 157	11091	100
	3188.22	35.7278			1515.26	13.662
	1150.43	12.8919			920.648	8.30084
	392.435	4.39769			289.213	2.60763
hsp104 160	8293.25	100		hsp104 157	7764.64	100
	2199.08	26.5166			992.184	12.7782
	682.749	8.23259			384.749	4.95514
	172.192	2.07629			92.192	1.18733
wt 157	17388.9	100		wt 160	9343.37	100
	7352.07	42.2802			2441.69	26.1329
	2710.4	15.5869			1771.84	18.9636
	1320.43	7.59349			1068.28	11.4336
dsk2 157	13715.5	100		dsk2 160	14610.8	100
	5307.44	38.6967			3999.38	27.3728
	1299.72	9.47629			2169.11	14.846
	719.163	5.24344			1038.92	7.11065
wt	20358.8	100
sis1 damp	1835.48	9.01566
wt	21200.7	100
sis1damp	744.678	3.51252
wt	32019.6	100
sis1 damp	2360.41	7.37174
