# Supplementary material for: A protein quality control pathway at the mitochondrial outer membrane
Source: eLife. 2020 Mar 2;9:e51065. doi: 10.7554/eLife.51065 (PMC7136024; doi:10.7554/eLife.51065)
Supplement: Figure 5—source data 1. [file elife-51065-fig5-data1.xlsx]

## Sheet: Figure 5
5A
CDC48 157	0	12275.3	10892.2	1.12698	100		20843.1	100		15302.7	100
	30	6881.59	11965.8	0.575104	51.0305		10484.5	50.3021		7453.88	48.7097
	60	3137.08	11209.6	0.279857	24.8325		6238.61	29.9313		3330.26	21.7626
	120	1554.6	10260.4	0.151514	13.4443		4292.61	20.5949		2297.55	15.014
cdc48-3 157	0	12077.3	9304.8	1.29797	100		15286.5	100		12357.9	100
	30	7216.76	9713.92	0.74293	57.238		9134.75	59.7571		8965.92	72.5519
	60	4491.57	9424.75	0.476572	36.7168		6545.85	42.8212		5686.25	46.0129
	120	3104.74	9762.94	0.318013	24.5009		5245.56	34.315		3392.57	27.4525
NPL4 157	0	11350.6	12706.6	0.89329	100		11226.6	100		12369.7	100
	30	6307.49	14114.7	0.446875	50.0257		6080.95	54.1654		4798.85	38.7952
	60	2289.36	13769	0.166269	18.6131		2532.38	22.5569		1639.79	13.2565
	120	1690.23	14561.4	0.116076	12.9943		1799.48	16.0286		1082.41	8.75045
npl4 157	0	10727	11360.2	0.94426	100		13358.2	100		9099.19	100
	30	6923.83	10127.1	0.683692	72.4051		9612.92	71.9628		6227.95	68.4452
	60	6740.78	10736.3	0.62785	66.4912		8378.68	62.7232		4574.2	50.2704
	120	7365.9	12195.4	0.60399	63.9643		7378.78	55.2379		3262.18	35.8513
UFD1 157	0	15985.6	12038.9	1.32783	100		7113.25	100		8100.56	100
	30	6704.75	12300.4	0.545086	41.0509		3012.24	42.3468		2772.03	34.2203
	60	3517.52	11836.1	0.297185	22.3813		1225.89	17.2339		1407.5	17.3753
	120	2105.2	10574.6	0.199082	14.993		815.527	11.4649		1528.91	18.8742
ufd1-1 157	0	15209.2	15243.1	0.997777	100		7781.3	100		11190.3	100
	30	10342.3	13563.8	0.762492	76.4191		6943.18	89.229		8393.07	75.0033
	60	9227.55	13699.9	0.673549	67.5049		6234.43	80.1207		6841.35	61.1366
	120	5477.1	13550.8	0.404191	40.5091		3168.58	40.7205		6108.93	54.5915
CDC48 160	0	5551.76	10448.2	0.531359	100		6684.07	100		6034.78	100
	15	2570.5	10460.6	0.245732	46.2459		2645.18	39.5743		3081.86	51.0683
	30	948.941	10490.8	0.090455	17.0233		1492.5	22.3291		968.062	16.0414
	60	582.77	11347.4	0.0513571	9.66524		776.598	11.6186		533.527	8.84087
cdc48-3 160	0	6470.3	10014.1	0.646119	100		6394.95	100		6578.12	100
	15	5046.93	10893	0.463317	71.7077		4482	70.0866		5046.23	76.7122
	30	4432.23	11437.2	0.387528	59.9779		2792.35	43.6649		4554.93	69.2436
	60	2845.45	10173.6	0.279688	43.2875		2075.2	32.4507		2732.91	41.5455
NPL4 160	0	13496.1	18884	0.714682	100		9639.29	100		7089.46	100
	15	6232.92	18108.6	0.344197	48.1608		3837.73	39.8134		1857.66	26.2031
	30	3858.9	18825.7	0.204981	28.6814		2181.03	22.6265		569.426	8.03201
	60	2413.35	19359	0.124663	17.4431		618.577	6.41725		208.113	2.93553
npl4 160	0	18089.1	20340.4	0.889317	100		8832.31	100		5067.54	100
	15	12341.8	20378.4	0.605634	68.101		4916.63	55.6664		4089.95	80.7089
	30	7399.87	19291	0.383592	43.1333		3794.61	42.9628		3541.25	69.881
	60	5865.87	19190.9	0.30566	34.3702		3395.42	38.4432		2209.96	43.6102
UFD1 160	0	5675.02	20333.4	0.279099	100		9217.82	100		6093.73	100
	15	2976.69	23874.5	0.124681	44.6727		3380.3	36.6713		2932.4	48.1215
	30	2298.2	24784.4	0.0927278	33.224		1872.33	20.312		2146.08	35.2179
	60	1308.65	25263.7	0.0517996	18.5596		1516.15	16.4481		1054.16	17.2991
ufd1-1 160	0	7529.2	23564.1	0.31952	100		11358.2	100		7830.15	100
	15	4657.35	23698.6	0.196524	61.5062		7495.1	65.9885		4798	61.276
	30	4055.12	24376.6	0.166353	52.0635		5557.83	48.9324		4066.42	51.9329
	60	3734.88	25495.5	0.146492	45.8476		4563.02	40.1739		3868.71	49.4079

## Sheet: Figure 5- figure supplement 1
S5A
WT 157	16328	100		WT 160	6431.93	100
	5832.47	35.7207			3571.79	55.5321
	2898.91	17.7543			1967.26	30.5858
	1248.13	7.64415			563.113	8.75496
msp1 157	11216.2	100		msp1 160	5066.57	100
	3478.1	31.0096			2333.38	46.0544
	1919.79	17.1162			1302.01	25.6981
	1230.2	10.9681			476.698	9.40869
S5D
WT 157	4733.38	100		wt 160	17281.2	100
	1978.65	41.802			2243.22	12.9807
	415.213	8.77203			347.435	2.01047
	264.092	5.57936			283.263	1.63913
dsk2rad23 157	6016.74	100		dsk2rad23 160	11691.3	100
	2034.06	33.8067			2188.93	18.7228
	575.627	9.56709			463.678	3.96602
	176.849	2.93928			45.95	0.393028
wt 157	4997.79	100		wt 160	20790.8	100
	2114.48	42.3082			3990.9	19.1956
	361.92	7.2416			1520.55	7.31358
	389.335	7.79014			1360.89	6.54566
ddi1 157	6162.86	100		ddi1 160	12041.7	100
	2144.89	34.8035			1957.5	16.2559
	516.92	8.38766			560.335	4.65328
	376.799	6.11403			143.435	1.19115
