# Supplementary material for: A protein quality control pathway at the mitochondrial outer membrane
Source: eLife. 2020 Mar 2;9:e51065. doi: 10.7554/eLife.51065 (PMC7136024; doi:10.7554/eLife.51065)
Supplement: Figure 6—source data 1. [file elife-51065-fig6-data1.xlsx]

## Sheet: Figure 6
6A
wt 157	0	11435.3	100		12926.2	100		22036.3	100
	30	2131.2	18.637		3760.28	29.0903		6368.69	28.9009
	60	1087.43	9.50935		1425.26	11.0261		2825.08	12.8201
	120	600.527	5.2515		801.355	6.19945		670.577	3.04305
doa1 157	0	17587.5	100		8833.61	100		14292.1	100
	30	8478.73	48.2089		5286.66	59.8471		6211.76	43.4628
	60	5748.25	32.6837		2930.79	33.1777		4566.69	31.9525
	120	4126.23	23.4611		1432.6	16.2176		751.698	5.25952
wt 160	0	7279.25	100		8382.39	100		7410.44	100		8053.12	100
	15	2093.77	28.7636		4521.9	53.9453		2884.4	38.9234		4418.23	54.8635
	30	1074.65	14.7632		2432.86	29.0235		1629.55	21.9899		2012.08	24.9851
	60	482.406	6.62714		555.234	6.62382		594.406	8.0212		721.355	8.95745
doa1 160	0	3089.72	100		7471.68	100		4021.69	100		5195.71	100		8661.02	100
	15	1922.18	62.2123		6178.9	82.6976		2878.86	71.5834		3294.45	63.407		4769.64	55.0702
	30	1484.18	48.0362		4744.18	63.4954		2322.91	57.7596		1929.5	37.1363		3803.4	43.9139
	60	871.477	28.2057		3029.22	40.5428		1198.01	29.7888		920.012	17.7071		2639.69	30.4778
6B
WT 157	0	11595.8	100		3093.98	100		4055.93	100
	30	4980.12	42.5272		1005.6	32.5017		1112.01	27.4169
	60	1900.2	16.0891		573.406	18.5329		540.284	13.3208
	120	1038.6	7.82938		260.456	8.41815		286.263	7.05788
ubx2 157	0	16041.6	100		8346.2	100		7414.78	100
	30	12488.7	79.7903		5285.3	63.3258		4354.18	58.7229
	60	10143.2	59.3833		4647.88	55.6886		3436.64	46.3485
	120	8334.51	53.0392		2960.4	35.47		2496.57	33.6702
wt 160	0	8245.56	100		4440.81	100		5984.42	100		9110.58	100
	15	3464.69	38.3605		1621.79	36.5201		2999.35	50.1193		5139.78	56.4155
	30	1996.2	20.9628		893.062	20.1103		1842.62	30.7903		2770.86	30.4137
	60	1601.26	16.2812		507.749	11.4337		1283.77	21.4519		615.163	6.75218
ubx2 160	0	15395.7	100		7622.37	100		7870.61	100		10594.4	100
	15	12809.2	85.1853		5491.12	72.0396		5758.07	73.1592		7936.97	74.9166
	30	11684	74.7514		4201.76	55.1241		4652.37	59.1106		5989.32	56.5328
	60	8968.22	64.6984		3335.52	43.7596		3861.22	49.0588		4879.54	46.0577
6C
wt 160	0	10181	100		9346.05	100		5642.12	100
	15	3781.88	34.4169		3758	40.2096		2490.33	44.1381
	30	2121.74	20.5798		2250.1	24.0755		995.062	17.6363
	60	966.406	8.51129		1205.89	12.9027		575.991	10.2088
ubx2 160	0	10579.6	100		10007	100		5583.18	100
	15	7515.78	75.3244		7677.9	76.7251		5053.88	90.5199
	30	5058.25	48.7043		6774.49	67.6973		3147.28	56.3707
	60	3773	36.1954		4932.61	49.2915		1968.91	35.2651
ubx2 +UBX2 160	0	6228.88	100		9955.73	100		6808.37	100
	15	2768.28	43.7622		5312.66	53.3628		3226.08	47.3841
	30	1322.01	19.2029		3326	33.4079		1605.6	23.5827
	60	774.991	12.4281		2743.76	27.5596		747.234	10.9752
WT 157	0	8001.07	100		10212.7	100		13581	100
	30	1887.43	23.7422		3259.22	31.9135		4063.66	29.9216
	60	1109.06	13.7893		1859.5	18.2077		1052.6	7.75051
	120	454.355	6.09623		1049.08	10.2724		618.941	4.5574
ubx2 157	0	13977.1	100		10729.4	100		10423.7	100
	30	8839.44	66.5898		5924.66	55.219		5116.49	49.085
	60	5807.71	40.0908		4227.54	39.4015		2099.38	20.1404
	120	4090.22	26.9102		2452.1	22.8541		1303.01	12.5004
ubx2 +UBX2 157	0	6212.88	100		14547.2	100		11455.7	100
	15	992.184	16.6647		4807.76	33.0494		3181.3	27.7703
	30	590.577	12.1217		2518.86	17.3151		1371.48	11.972
	60	229.849	3.81352		1824.15	12.5395		511.113	4.46164
6D
wt 160	0	7874.39	100		5272.95	100		7881.88	100
	15	3762.42	41.3012		1786.01	33.8712		2914.38	36.9756
	30	1801.64	19.4672		671.527	12.7353		1082.06	13.7285
	60	1053.2	11.8539		290.92	5.51721		490.163	6.21886
ubx2 160	0	14944.4	100		12275	100		6010.33	100
	15	11606	70.6381		9016.17	73.4517		4280.5	71.219
	30	8846.27	47.7955		6073.57	49.4793		2541.2	42.2807
	60	6927.68	37.3424		4304.74	35.0692		2059.01	34.2579
ubx2 +DOA1 160	0	17081.4	100		12655.2	100		13419	100
	15	13512.6	75.5306		9589.78	75.7776		9771.44	72.8181
	30	11387.7	60.7471		7316.57	57.8149		6625.57	49.3747
	60	9640.87	50.9705		5746.1	45.4052		4378.62	32.6301
WT 157	0	5326.05	100		5376.47	100		7385.35	100
	30	1744.84	30.4701		1814.67	33.7521		3151.08	42.6667
	60	1355.72	23.5778		1042.36	19.3874		2588.67	35.0514
	120	588.991	10.143		605.577	11.2635		1995.13	27.0148
ubx2 157	0	5953.52	100		5937.52	100		3800.2	100
	30	6470.28	108.501		5950.74	100.223		3261.84	85.8333
	60	5803.33	98.9028		4759.67	80.1626		2364.67	62.2248
	120	5765.28	98.0852		3432.58	57.8116		2000.5	52.6418
ubx2 +DOA1 157	0	7106.25	100		7033.83	100		8511.95	100
	15	7149.42	96.5832		5479.93	77.9082		6537.76	76.8068
	30	5703.47	80.2601		4308.55	61.2546		6027.88	70.8167
	60	5436.56	76.5045		4525.31	64.3364		5559.84	65.318

## Sheet: Figure 6- figure supplement 1
S6A
WT 157	9168.71	100		WT 160	9520.12	100
	1048.99	11.441			4978.93	52.299
	536.92	5.856			2636.15	27.6903
	306.799	3.34615			1128.6	11.8549
vms1 157	6585.25	100		vms1 160	7411.66	100
	1190.53	18.0787			3767.93	50.8379
	475.749	7.22447			2058.98	27.7803
	244.263	3.70925			1459.89	19.6972
S6B	157			160
WT	19827.6	100		9346.09	100
	13171.8	66.4315		5194.83	55.5829
	8671.85	43.7363		2493.74	26.6822
	5437.33	27.423		1173.89	12.5602
ubx1	16237.1	100		7690.95	100
	8298.37	51.1075		4444.57	57.7896
	4597.67	28.3158		2271.55	29.5353
	3155.96	19.4367		1202.89	15.6403
wt	7951.9	100		6006.76	100
	1868.5	23.4975		3483.57	57.9941
	966.77	12.1577		2353.33	39.178
	440.456	5.539		1560.79	25.9839
ubx3	6864.66	100		6335.1	100
	1612.26	23.4863		3956.52	62.4539
	871.941	12.7019		2327.45	36.7389
	513.577	7.48146		1732.55	27.3484
wt	8568.25	100		7307.59	100
	1622.08	18.9313		3691.28	50.5129
	677.527	7.90742		2368.62	32.4131
	516.577	6.02897		1169.31	16.0012
ubx4	4955.93	100		5900.05	100
	949.77	19.1643		3046.33	51.6322
	541.698	10.9303		1988.38	33.701
	404.335	8.15861		1210.89	20.5234
wt	8181.83	100		8234.15	100
	2050.96	25.0673		2985.18	36.2537
	1422.6	17.3873		1674.48	20.3358
	1034.01	12.6379		695.698	8.44894
ubx5	5447.23	100		5029.91	100
	1942.55	35.6612		2117.89	42.1059
	998.184	18.3246		1548.48	30.7854
	522.406	9.59031		580.406	11.5391
wt	13733.9	100		7642.61	100
	4961.42	36.1252		4109.88	53.7759
	2428.98	17.686		2339.45	30.6106
	1646.67	11.9898		1800.03	23.5526
ubx6	9804.97	100		6999.59	100
	3955.05	40.3372		3898.69	55.6988
	2262.57	23.0757		2817.57	40.2533
	1082.84	11.0438		1581.96	22.6008
wt	11561.4	100		7028.47	100
	5187.59	44.8698		3150.62	44.8265
	2174.74	18.8103		1939.08	27.589
	1044.01	9.03012		1129.53	16.0707
ubx7	10055.7	100		5010.52	100
	4381.71	43.5743		2223.38	44.3742
	2353.57	23.4053		1273.11	25.4088
	1051.33	10.455		931.355	18.588
S6C
WT-158	19881.1	4015.96	4.95052	100
	15022.4	4510.33	3.33067	67.2792
	15885	5326.03	2.98253	60.2468
	13638.3	4570.91	2.98372	60.271
ubx2-158	23289.9	5460.74	4.26497	100
	14034.9	5374.15	2.61155	61.2326
	12977.7	5514.28	2.35347	55.1815
	13898	5219.86	2.66252	62.4278
WT-159	22815.2	221404	0.103048	100
	21725.8	211010	0.102961	99.9162
	19074.8	202152	0.0943587	91.5681
	19397.7	191810	0.10113	98.139
ubx2 159	14914.7	110994	0.134374	100
	15195.7	100429	0.151307	112.601
	13658.9	101418	0.13468	100.228
	13446.8	111090	0.121044	90.0796
S6E	157			160
wt	9665.61	100		18261.5	100
	1628.21	16.8454		9325.32	51.0654
	1286.92	13.3144		3472.12	19.0133
	415.799	4.30184		1328.99	7.27755
5x emc	6071.01	100		9380.17	100
	3492.53	57.5279		3081.47	32.8509
	2260.46	37.2336		3125.18	33.3168
	935.627	15.4114		2314.69	24.6764
S6F	157				160
wt	10850.8	100		wt	8747.4	100
	2453.55	22.6117			4887.62	55.8751
	1363.65	12.5673			2770.96	31.6776
	602.234	5.55014			980.234	11.206
mmm1	6391.03	100		mmm1	3745.67	100
	1558.18	24.3808			2096.18	55.9629
	861.113	13.4738			1092.53	29.1677
	250.506	3.91965			283.355	7.56487
mdm10	11395.5	100		mdm10	13965.2	100
	3709.2	32.5498			5729.32	41.0256
	1380.48	12.1143			3248	23.2578
	522.698	4.58689			866.163	6.20228
mdm34	18334.4	100		mdm34	8795.95	100
	5518.86	30.1011			4347.52	49.4263
	2693.67	14.6919			2577.57	29.304
	1466.84	8.00048			931.497	10.5901
mdm12	10456.5	100		mdm12	4381.42	100
	2252.2	21.5388			1624.79	37.0837
	1052.48	10.0653			1002.79	22.8873
	415.456	3.97319			266.648	6.08588
S6G	157				160
WT	13746.9	100		8189.49	100
	2366.2	17.2127		4260.45	52.0234
	1871.91	13.617		2500.67	30.5351
	1527.26	11.1098		967.062	11.8086
ubc6ubc7	11346.7	100		7399.42	100
	2765.98	24.377		3863.33	52.2112
	1963.79	17.3071		2265.84	30.6219
	1387.26	12.2261		953.062	12.8802
wt	10769.1	100		7680.71	100
	3613.03	33.5499		4093.93	53.3015
	1538.01	14.2817		2157.57	28.0907
	875.355	8.12836		1252.79	16.3109
doa10hrd1	11845.9	100		6099.98	100
	4838.05	40.8417		3832.91	62.8348
	1078.06	9.10074		2044.96	33.5241
	1108.6	9.35852		1016.36	16.6616
S6J
WT	7580.07	100
fzo1	5032.47	66.3907
	3691.4	48.6987
	1914.08	25.2515
doa1	7572.78	100
	6002.3	79.2614
	4202.81	55.4989
	3088.69	40.7867
S6K	fzo1
WT + EV	7092.52	100
	4393.33	61.9431
	1730.89	24.4045
	413.042	5.82363
ubx2 + EV	7086.81	100
	5473.91	77.2408
	4933.79	69.6193
	3470.96	48.9778
ubx2 + UBX2 FLAG	9158.37	100
	4855.28	53.0146
	2474.84	27.0227
	672.698	7.34517
S6O	fzo1
wt	12502.1	100
	4999.91	39.9925
	3527.26	28.2132
	1835.18	14.679
mmm1	2205.89	100
	496.456	22.5059
	426.92	19.3536
	190.607	8.64082
mdm10	6052.18	100
	2930.53	48.421
	1592.99	26.3209
	852.577	14.0871
mdm34	6893.3	100
	2796.15	40.5634
	1740.26	25.2456
	906.092	13.1445
mdm12	4216.01	100
	1235.94	29.3154
	338.284	8.02379
	232.506	5.51483
